# Supplementary material for: High-dimensional single-cell analysis of human natural killer cell heterogeneity
Source: PubMed Central journal article supplement (PMC11291291; doi:10.1038/s41590-024-01883-0), 2024-07-02
Supplement: 41590_2024_1883_MOESM4_ESM.pdf [file 41590_2024_1883_MOESM4_ESM.pdf]

**Supplementary Table 2: Summary of cluster proportions.**

|              | <b>Mean</b> | <b>SD</b> |
|--------------|-------------|-----------|
|              |             |           |
| <b>NK1</b>   | 58.9 %      | ± 12.2%   |
| <i>NK1A</i>  | 18.9%       | ± 4.3%    |
| <i>NK1B</i>  | 14.2%       | ± 5.2%    |
| <i>NK1C</i>  | 25.8%       | ± 6.1%    |
|              |             |           |
| <b>NK2</b>   | 5.7%        | ± 4.1%    |
|              |             |           |
| <b>NKint</b> | 11.1%       | ± 3.8%    |
|              |             |           |
| <b>NK3</b>   | 24.3%       | ± 13.9%   |
