# Supplementary material for: High-dimensional single-cell analysis of human natural killer cell heterogeneity
Source: PubMed Central journal article supplement (PMC11291291; doi:10.1038/s41590-024-01883-0), 2024-07-02
Supplement: 41590_2024_1883_MOESM5_ESM.pdf [file 41590_2024_1883_MOESM5_ESM.pdf]

**Supplementary Table 3: Dataset presentation.**

| <b>Dataset DOI</b>                                                      | <b>Sorting strategy</b>                                                                                                                         | <b>Protocol / Chemistry</b> | <b>Number of samples</b> | <b>Number of cells after filtering</b> | <b>GSE number<br/>Sample ID / HCMV status</b>                                                                                                                                              |
|-------------------------------------------------------------------------|-------------------------------------------------------------------------------------------------------------------------------------------------|-----------------------------|--------------------------|----------------------------------------|--------------------------------------------------------------------------------------------------------------------------------------------------------------------------------------------|
| <b>Dataset 1</b><br>Crinier 2018, DOI:<br>10.1016/j.immuni.2018.09.009. | CD3 <sup>-</sup> , CD14 <sup>-</sup> , CD19 <sup>-</sup> ,<br>CD45 <sup>+</sup> , CD56 <sup>+</sup>                                             | 3' V2                       | 1                        | 1,467                                  | <b>GSE119562</b><br>GSM3377678                                                                                                                                                             |
| <b>Dataset 2</b><br>Yang 2019, DOI:<br>10.1038/s41467-019-11947-7       | CD3 <sup>-</sup> , CD19 <sup>-</sup> , CD14 <sup>-</sup> ,<br>CD7 <sup>+</sup>                                                                  | 3' V2                       | 2                        | 2,807                                  | <b>GSE130430</b><br>GSM3738542<br>GSM3738543                                                                                                                                               |
| <b>Dataset 3</b><br>Witkowski 2021, DOI:<br>10.1038/s41586-021-04142-6  | CD3 <sup>-</sup> , CD19 <sup>-</sup> , CD14 <sup>-</sup> ,<br>CD45 <sup>+</sup> , CD56 <sup>+</sup>                                             | 5' V2                       | 5                        | 7,569                                  | <b>GSE184329</b><br>GSM5584154<br>GSM5584155<br>GSM5584156_1<br>GSM5584156_2<br>GSM5584156_3                                                                                               |
| <b>Dataset 4</b><br>Rückert 2022, DOI:<br>10.1038/s41590-022-01327-7    | CD3 <sup>-</sup> , CD14 <sup>-</sup> , CD19 <sup>-</sup> ,<br>CD7 <sup>+</sup> , NKG2C <sup>+</sup> or<br>NKG2C <sup>-</sup> (combined<br>1:1)  | Dataset 4a<br>3' V2         | 5                        | 24,427                                 | <b>GSE197037</b><br>GSM5907303 HCMV <sup>neg</sup><br>GSM5907304 HCMV <sup>neg</sup><br>GSM5907300 HCMV <sup>pos</sup><br>GSM5907301 HCMV <sup>pos</sup><br>GSM5907302 HCMV <sup>pos</sup> |
|                                                                         |                                                                                                                                                 | Dataset 4b<br>3' V3         | 2                        | 14,991                                 | <b>GSE197037</b><br>GSM5907305 HCMV <sup>pos</sup><br>GSM5907306 HCMV <sup>pos</sup>                                                                                                       |
| <b>Dataset 5</b><br>Hao 2021, DOI:<br>10.1016/j.cell.2021.04.048        | Based on ADT and<br>authors annotations:<br>CD3 <sup>-</sup> , CD14 <sup>-</sup> , CD19 <sup>-</sup> ,<br>CD45 <sup>+</sup> , CD56 <sup>+</sup> | 3' and 5' V3<br>+ 228 ADT   | 8                        | 5,708                                  | <b>GSE164378</b><br>GSM5008737<br>GSM5008738<br>GSM5008739<br>GSM5008740<br>GSM5008741<br>GSM5008742                                                                                       |
| <b>Dataset 6</b><br>Tang 2023, DOI:<br>10.1016/j.cell.2023.07.034       | "In silico sorting":<br>CD3E <sup>-</sup> CD3G <sup>-</sup> ,<br>CD3D <sup>-</sup> , KLRF1 <sup>+</sup> or<br>NCAM1 <sup>+</sup>                | 3' and 5' V3<br>and V2      | 676                      | 84,343 (blood)<br>34,756 (tumor)       | <b>GSE212890</b>                                                                                                                                                                           |
| <b>Dataset 7</b><br>Jaeger, under review                                | Tissue-dependent<br>sorting                                                                                                                     | 3' and 5' V3<br>and V2      | 19                       | 48,621                                 | <b>GSE240441</b>                                                                                                                                                                           |
